# Supplementary material for: The Expression of Epac2 and GluA3 in an Alzheimer’s Disease Experimental Model and Postmortem Patient Samples
Source: MDPI journal article supplement (doi:10.3390/biomedicines11082096), 2023-07-25
Supplement: s1 [file s1]

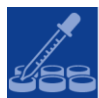

Supplementary Materials

**Table S1.** Characteristics of healthy controls and AD patients.

|                                   | Controls (n=6) | AD (n=7)     |
|-----------------------------------|----------------|--------------|
| Gender, female (n%)               | 1 (16.67)      | 2 (28.57)    |
| Age (years), mean (SEM)           | 80.17 (1.45)   | 76.21 (3.58) |
| Braak stage, mean (SEM)           | N.D.           | 4.60 (0.60)  |
| Anti-depressant medication, n (%) | N.D.           | 1 (16.67)    |

n, number of patients; SEM, standard error mean; N.D., not determined;
